# Supplementary material
Source: publisher figshare collection journal article supplement (https://gsapubs.figshare.com/ndownloader/files/22886465)
Supplement: Supplementary file 1 [file 22886465]

## Sheet: Table S2
		MgO	CaO	FeO	MnO
	Carb Clair	0.47	51.89	0.24	0.12
	DPA	14.69	29.37	8.88	0.21
	24A4_A	1.98	62.315	0.165	0.02
	24A4_B	1.75	62.91	0.18	0.04
	24A4_C	3.895	60.32	0.04	0.02
	24A4_D	2.035	61.56	0.19	0
	24A4_E	3.845	60.67	0.08	0
	24A4_F	3.30333	60.8433	0.0733333	0.0566667
	EL14_A	1.14	61.32	0.165	0
	EL14_B	1.06	61.48	0.315	0
	EL14_C	1.865	61.59	0.095	0
	19B_A	6.735	56.59	0.025	0.025
	19B_B	0.63	61.14	0.04	0
	19B_C	1.79333	58.69	0.663333	0.0166667
	19B_D	4.295	60.15	0.34	0.04
	24C4_A	0	62.3	0.07	0.01
	24C4_B	5.265	59.125	0.415	0.01
	24C4_E	0.39	60.595	0.03	0.02
	MON_5	3.12667	60.53	0.07	0.02

## Sheet: G47629
Casola, V., et al., 2020, No evidence for carbon enrichment in the mantle source of carbonatites in eastern Africa: Geology, v. 48, https://doi.org/10.1130/G47629.1
